# Supplementary material
Source: PubMed Central journal article supplement (PMC7261142)
Supplement: NIHMS1046271-supplement-Supplementary_Table_1.pdf [file NIHMS1046271-supplement-Supplementary_Table_1.pdf]

**Supplement Table 1. Cognitive measures**

| <b>Test</b>                                                             | <b>Function Assessed</b>                                                             | <b>Task Details</b>                                                                                                                                                                                                                                                             | <b>Measures</b>                                                                                                                                                                                                       | <b>Score Range</b>                                                                                                                                                                               |
|-------------------------------------------------------------------------|--------------------------------------------------------------------------------------|---------------------------------------------------------------------------------------------------------------------------------------------------------------------------------------------------------------------------------------------------------------------------------|-----------------------------------------------------------------------------------------------------------------------------------------------------------------------------------------------------------------------|--------------------------------------------------------------------------------------------------------------------------------------------------------------------------------------------------|
| <b>Selective Reminding Test</b> (6 trial version)                       | Anterograde verbal memory                                                            | Subjects recall a list of 12 words over repeated trials. They are “reminded” of the missed words prior to each immediate recall trial.                                                                                                                                          | Long-term storage (LTS) = a word recalled on two consecutive trials, adjusted for age/sex<br>Continuous long-term retrieval (CLTR) = a word recalled on all subsequent trials, adjusted for age/sex<br>Delayed recall | Age and sex adjusted.<br>LTS:<br>women: 0-72<br>men < 60 years of age: 0-77<br>men ≥ 60 years of age: 0-81<br>CLTR:<br>women: 0-72<br>men < 60 years of age: 0-74<br>men ≥ 60 years of age: 0-80 |
| <b>7-24 Spatial Memory Test</b>                                         | Anterograde visual learning and memory                                               | Subjects reproduce spatial arrangements of disks within printed boxes using short-term memory                                                                                                                                                                                   | Learning score<br>Immediate recall<br>Delayed recall                                                                                                                                                                  | Learning score: 0-35<br>Immediate recall: 0-7<br>Delayed recall 0-7                                                                                                                              |
| <b>Wechsler Memory Scale-III Digit Span</b>                             | Auditory-verbal span, working memory                                                 | Subjects repeat series of numbers, which gradually increase in length. Lists are repeated both forwards and backwards.                                                                                                                                                          | Total span forwards and backwards                                                                                                                                                                                     | 0-30                                                                                                                                                                                             |
| <b>Wechsler Memory Scale-III Spatial Span</b>                           | Visual span, working memory                                                          | The task is a non-verbal analogue to the digit span. Subjects recall the order in which the blocks in a display are tapped, with the number of tapped blocks increasing gradually over repeated trials. Subjects tap the blocks in the specified order, forwards and backwards. | Total span forwards and backwards                                                                                                                                                                                     | 0-32                                                                                                                                                                                             |
| <b>Wechsler Adult Intelligence Scale-III Block Design</b>               | Visual construction                                                                  | Subjects arrange blocks in specified patterns                                                                                                                                                                                                                                   | Total correct                                                                                                                                                                                                         | 0-68                                                                                                                                                                                             |
| <b>Delis-Kaplan Executive Functioning System (DKEFS) Verbal Fluency</b> | Word generation; initiation and maintenance of verbal search and retrieval processes | Subjects name as many words as possible beginning with a given letter (i.e. words beginning with “F”), belonging to a given category (i.e. “boys’ names”), or switching between categories (i.e. “fruits and furniture”) within a specified time limit                          | Total words generated, summed across letter, category, and switching tasks                                                                                                                                            | 0-no defined maximum                                                                                                                                                                             |
| <b>Delis-Kaplan Executive Functioning System (DKEFS) Design Fluency</b> | Non-verbal generativity                                                              | Subjects draw a series of designs by connecting dots and following specified rules (connecting only filled dots, only empty dots, or                                                                                                                                            | Total designs, summed across filled dot, empty dot, and switching tasks                                                                                                                                               | 0-no defined maximum                                                                                                                                                                             |

|                                            |                                                           |                                                                                                                                                                                                                                              |                                                                                               |                                                                                                        |
|--------------------------------------------|-----------------------------------------------------------|----------------------------------------------------------------------------------------------------------------------------------------------------------------------------------------------------------------------------------------------|-----------------------------------------------------------------------------------------------|--------------------------------------------------------------------------------------------------------|
|                                            |                                                           | alternating filled/empty dots). They must generate as many different patterns as possible within an allotted amount of time                                                                                                                  |                                                                                               |                                                                                                        |
| <b>Stroop Color Word Interference Test</b> | Divided attention, response inhibition, psychomotor speed | Subjects see a list of words, all names for colors. The words are printed in ink of a different color (i.e. the word "green" printed in blue ink). Subjects will be asked to read aloud either the word or the color in which it is printed. | Total time to complete the task, summed across color-word interference and switching subtests | Less time required for task completion reflects better performance. Maximum time allotted = 6 minutes. |
